# Supplementary material for: Epigenetic Evolution of ACE2 and IL-6 Genes: Non-Canonical Interferon-Stimulated Genes Correlate to COVID-19 Susceptibility in Vertebrates
Source: Genes (Basel). 2021 Jan 25;12(2):154. doi: 10.3390/genes12020154 (PMC7912275; doi:10.3390/genes12020154)
Supplement: Supplementary file 1 [file genes-12-00154-s001.xlsx]

## Sheet: Sheet1
Spacies		Expression level (Log2 base)					RNA Variants									RPKM
Homo sapiens (human)		30440
Mus musculus (house mouse)		36985
Rattus norvegicus (Norway rat)		41731
Danio rerio (zebrafish)		56846														N/A
Sus scrofa (pig)		107583														N/A
Macaca mulatta (Rhesus monkey)		30436
																N/A
Oryctolagus cuniculus (rabbit)		40864
																N/A
Canis lupus familiaris (dog)		12077														N/A
Bos taurus (cattle))		51428
Ovis aries (sheep)		42010
Xenopus tropicalis (tropical clawed frog)		26286
Felis catus (domestic cat)		18410
Gallus gallus (chicken)		42185
Equus caballus (horse)		7646
Rhinolophus ferrumequinum (greater horseshoe bat)		39283
Ailuropoda melanoleuca (giant panda)		522
Mustela putorius furo (domestic ferret)		2165
Mesocricetus auratus (golden hamster)		257
Lontra canadensis (Northern American river otter		11338
Bos indicus x Bos taurus (hybrid cattle)		18028
Bos indicus (zebu cattle) ]		16450
Manis javanica (Malayan pangolin)		3601
Camelus dromedarius (Arabian camel)		7390
Bison bison bison		2610
Chlorocebus sabaeus (green monkey)		13494
Panthera tigris altaica (Amur tiger)		2604
Vicugna pacos (alpaca)		7388
Bubalus bubalis (water buffalo)		19662
Capra hircus (goat)		3300
Cavia porcellus (domestic guinea pig)		1577
